# Supplementary material
Source: PubMed Central journal article supplement (PMC2267685)

**Supplemental Figure 1**

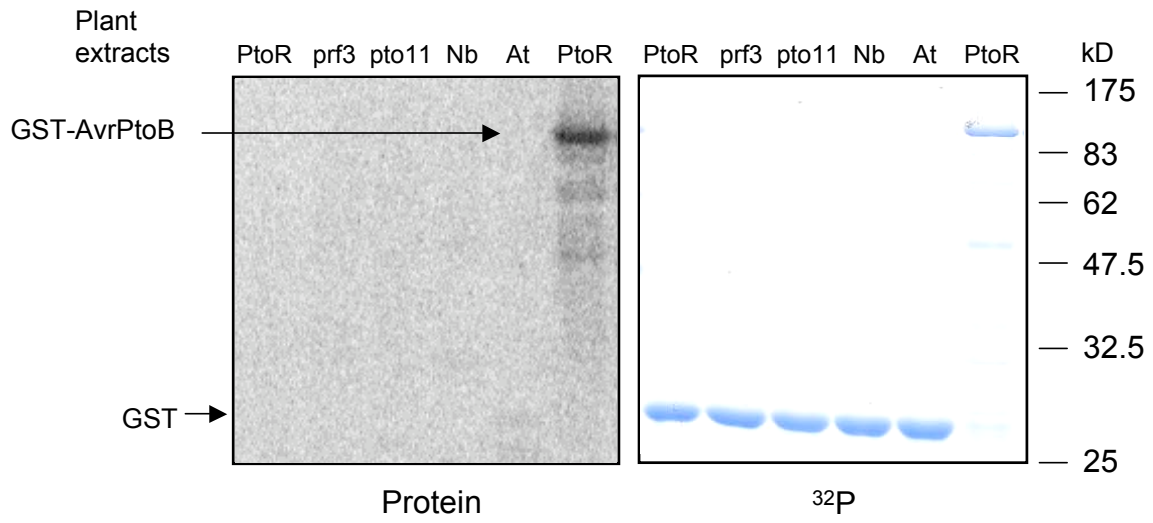

Supplement: NIHMS41284-supplement-supplement_1.pdf [file NIHMS41284-supplement-supplement_1.pdf]
